# Supplementary material for: Serum Calprotectin as a Potential Predictor of Microvascular Manifestations in Patients with Antiphospholipid Syndrome
Source: Springer Nature journal article supplement (doi:10.1007/s40744-023-00610-9), 2023-10-31
Supplement: MOESM1 [file 26245750]

# Serum Calprotectin as a Potential Predictor of Microvascular Manifestations in Patients with Antiphospholipid Syndrome

Yuan Zhao<sup>1,2,3,4</sup>, Wanting Qi<sup>1,2,3,4</sup>, Can Huang<sup>1,2,3,4</sup>, Yangzhong Zhou<sup>1,2,3,4</sup>, Qian Wang<sup>1,2,3,4</sup>, Xiping Tian<sup>1,2,3,4</sup>, Mengtao Li<sup>1,2,3,4</sup>, Yan Zhao<sup>1,2,3,4</sup>, Xiaofeng Zeng<sup>1,2,3,4</sup>, Jiuliang Zhao<sup>1,2,3,4</sup>

<sup>1</sup>Department of Rheumatology and Clinical Immunology, Peking Union Medical College Hospital (PUMCH), Chinese Academy of Medical Sciences and Peking Union Medical College, No. 1 Shuaifuyuan, Beijing, 100730, China

<sup>2</sup>National Clinical Research Center for Dermatologic and Immunologic Diseases (NCRC-DID), Ministry of Science and Technology, Beijing, China

<sup>3</sup>State Key Laboratory of Complex Severe and Rare Diseases, Peking Union Medical College Hospital, Chinese Academy of Medical Sciences and Peking Union Medical College, Beijing, China

<sup>4</sup>Key Laboratory of Rheumatology and Clinical Immunology, Ministry of Education, Beijing, China

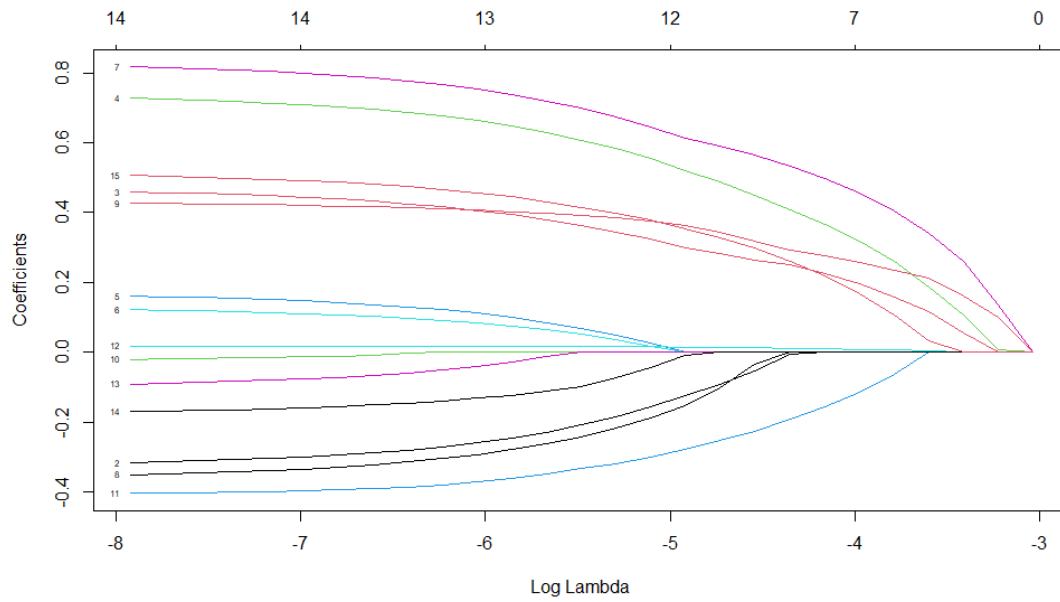

Figure S1. The trajectory of each independent variable in lasso regression of calprotectin.

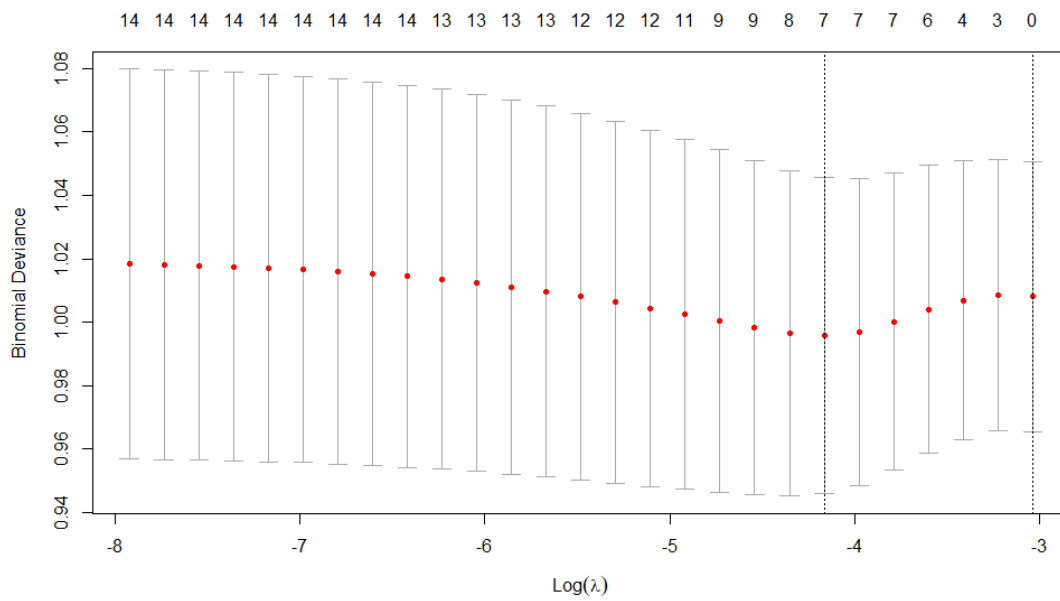

Figure S2. Cross-validation plot of LASSO regression analysis of calprotectin.

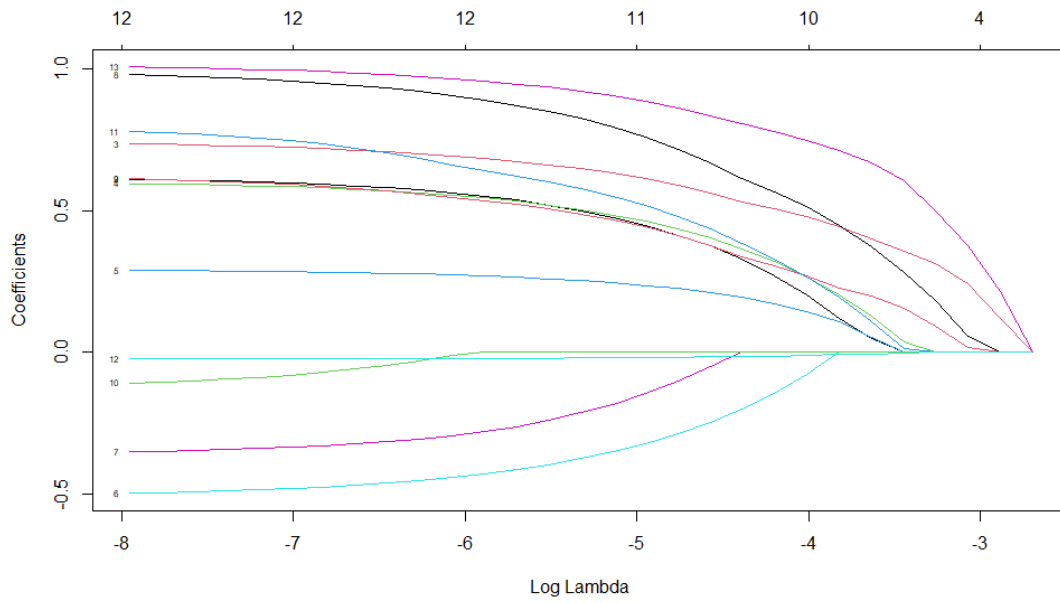

Figure S3. The trajectory of each independent variable in lasso regression of microvascular manifestations.

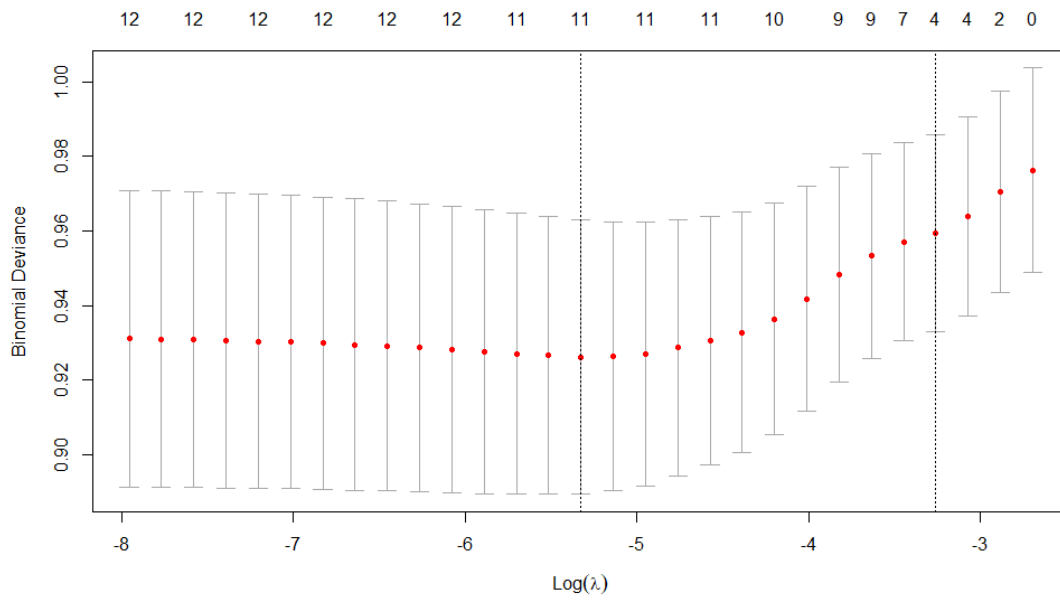

Figure S4. Cross-validation plot of LASSO regression analysis of microvascular manifestations.
